# Supplementary material
Source: MDPI journal article supplement (https://www.mdpi.com/search?q=molecules-25-00153)
Supplement: s001 [file molecules-25-00153-s001.pdf]

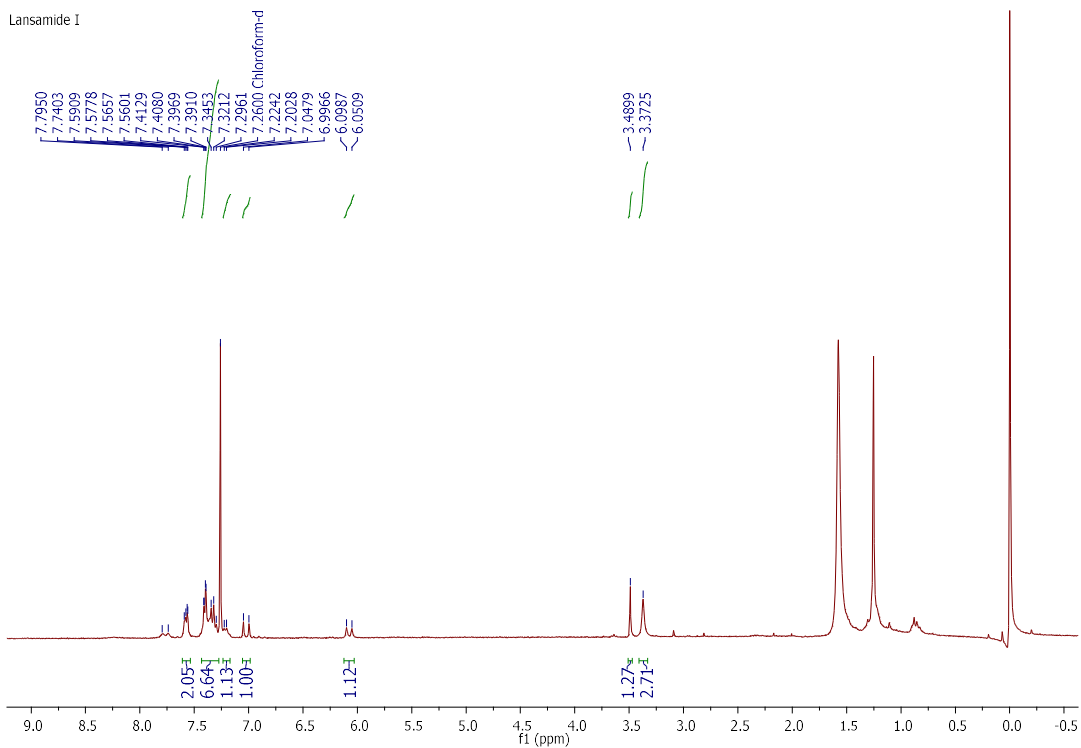

Figure S2:  $^1\text{H}$  NMR spectrum (300 MHz,  $\text{CDCl}_3$ ) of Lansamide I (19).

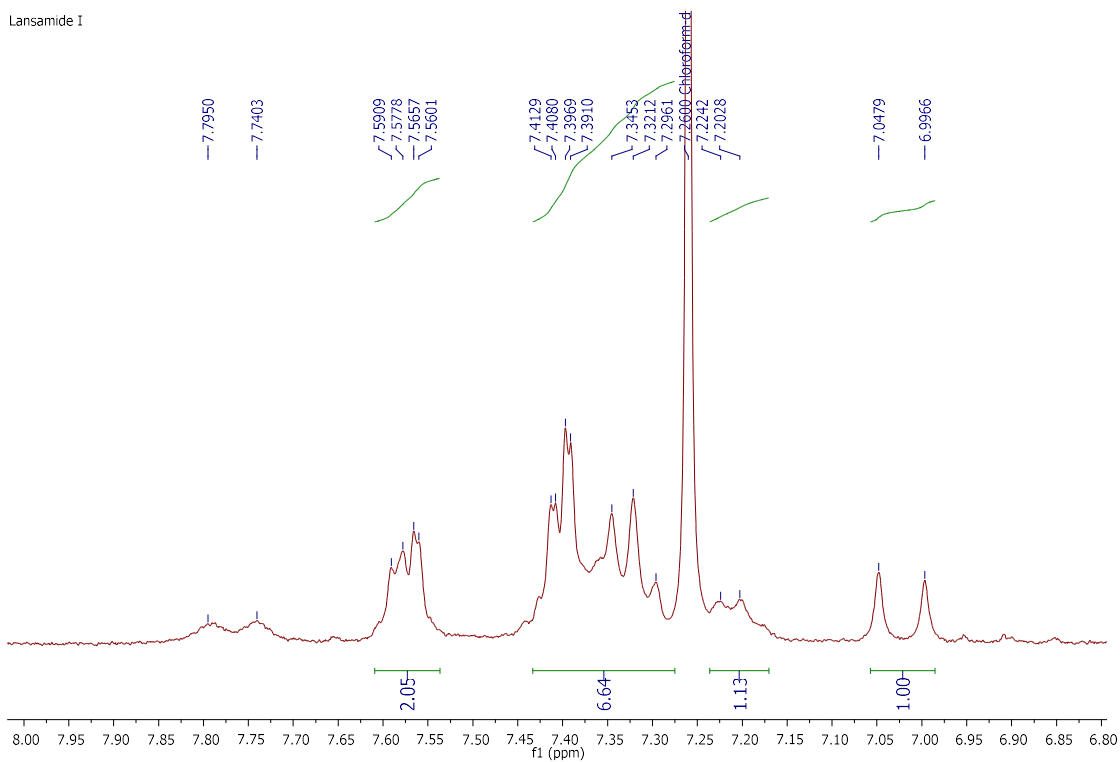

Figure S3: Enlarged  $^1\text{H}$  NMR spectrum (300 MHz,  $\text{CDCl}_3$ ) of Lansamide I (19).

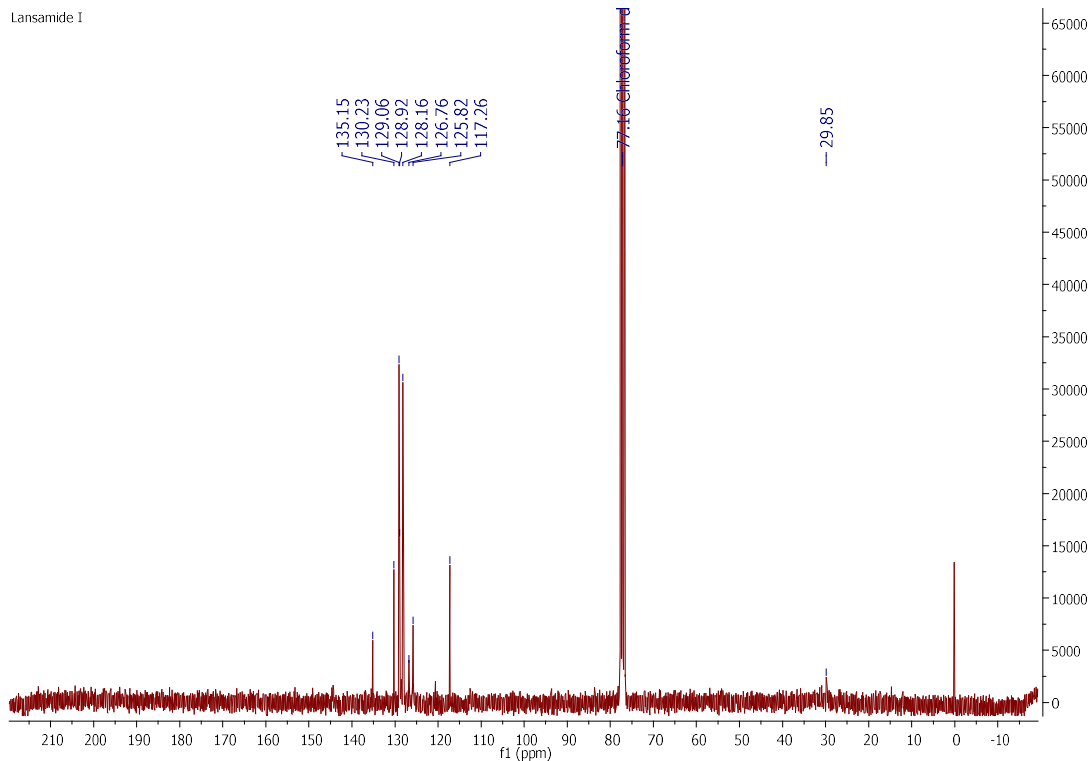

Figure S4:  $^{13}\text{C}$  NMR spectrum (75 MHz,  $\text{CDCl}_3$ ) of Lansamide I (19).

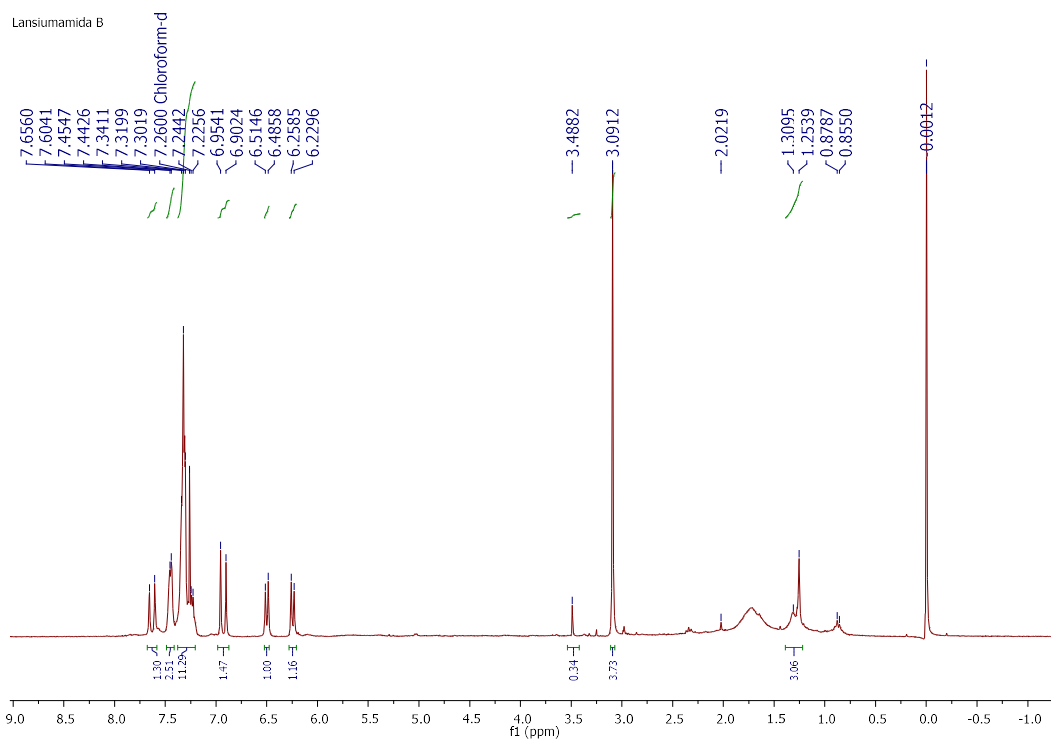

Figure S5:  $^1\text{H}$  NMR spectrum (300 MHz,  $\text{CDCl}_3$ ) of Lansiumamida B (20).

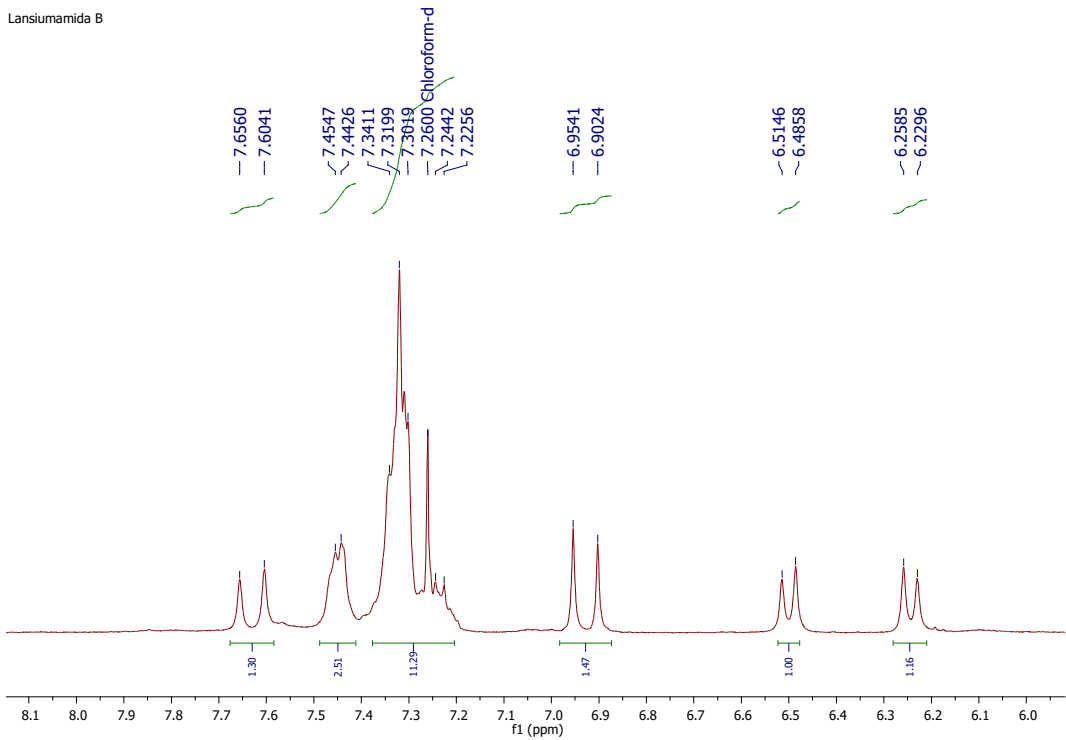

Figure S6: Enlarged  $^1\text{H}$  NMR spectrum (300 MHz,  $\text{CDCl}_3$ ) of Lansiumamide B (20)

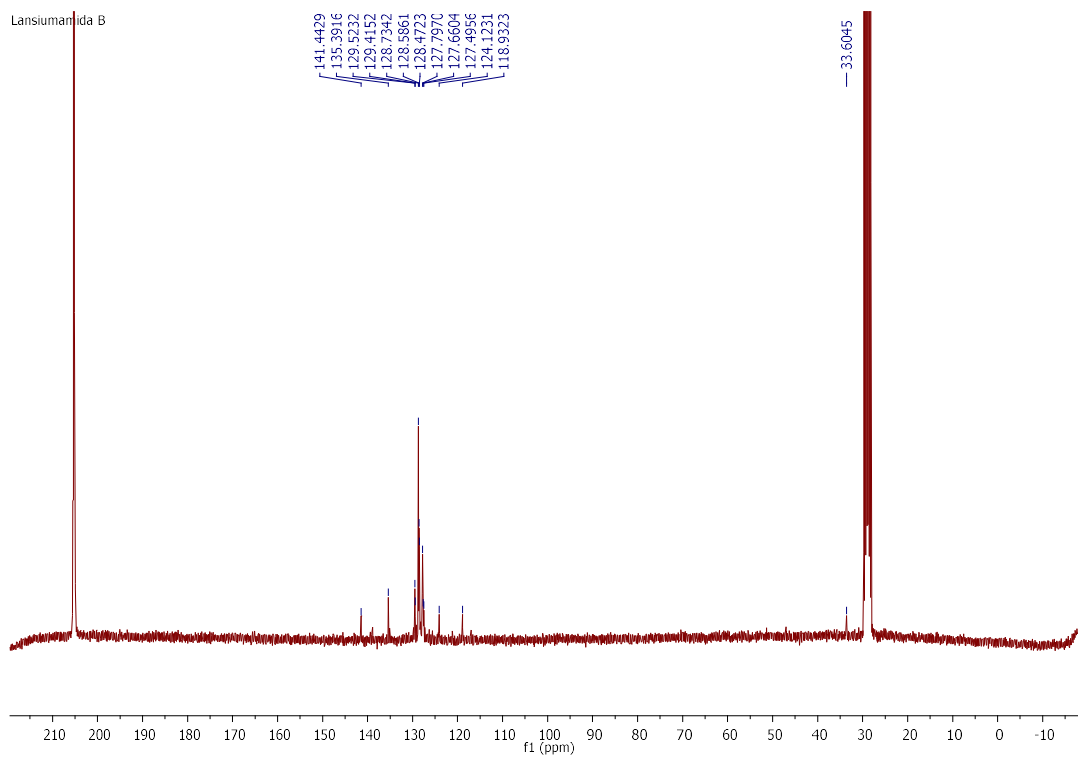

Figure S7.  $^{13}\text{C}$  NMR spectrum (75 MHz,  $\text{CDCl}_3$ ) of Lansiumamide B (20).

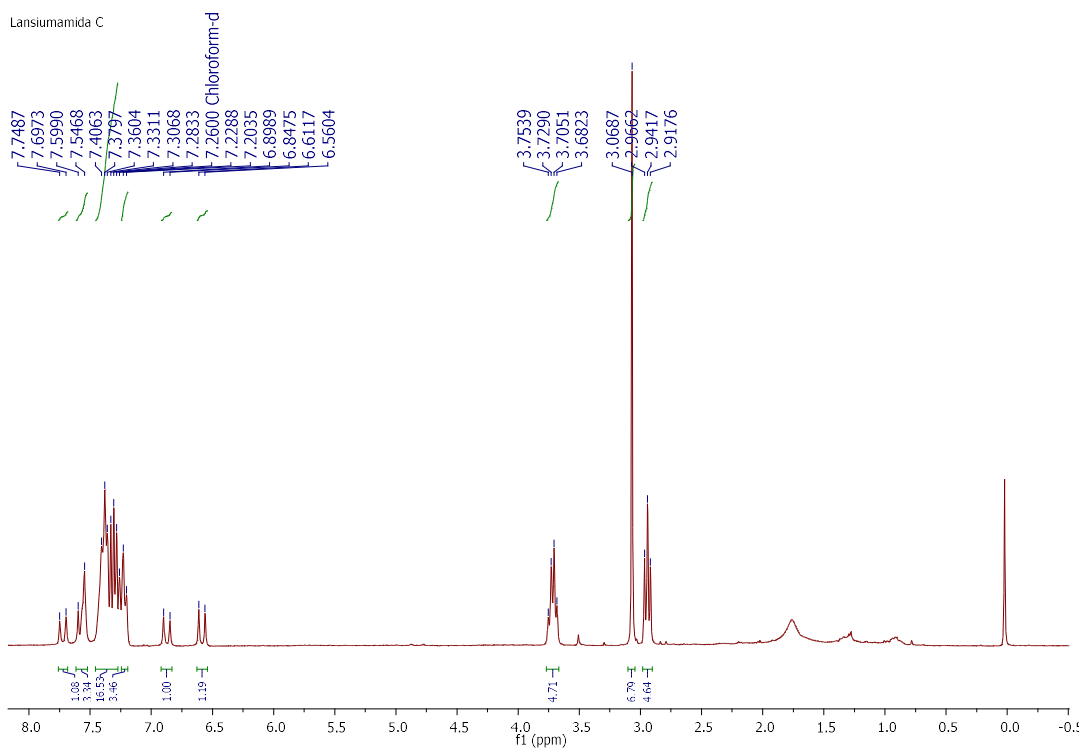

**Figure S8.**  $^1\text{H}$  NMR spectrum (300 MHz,  $\text{CDCl}_3$ ) of Lansiumamide C (**21**).

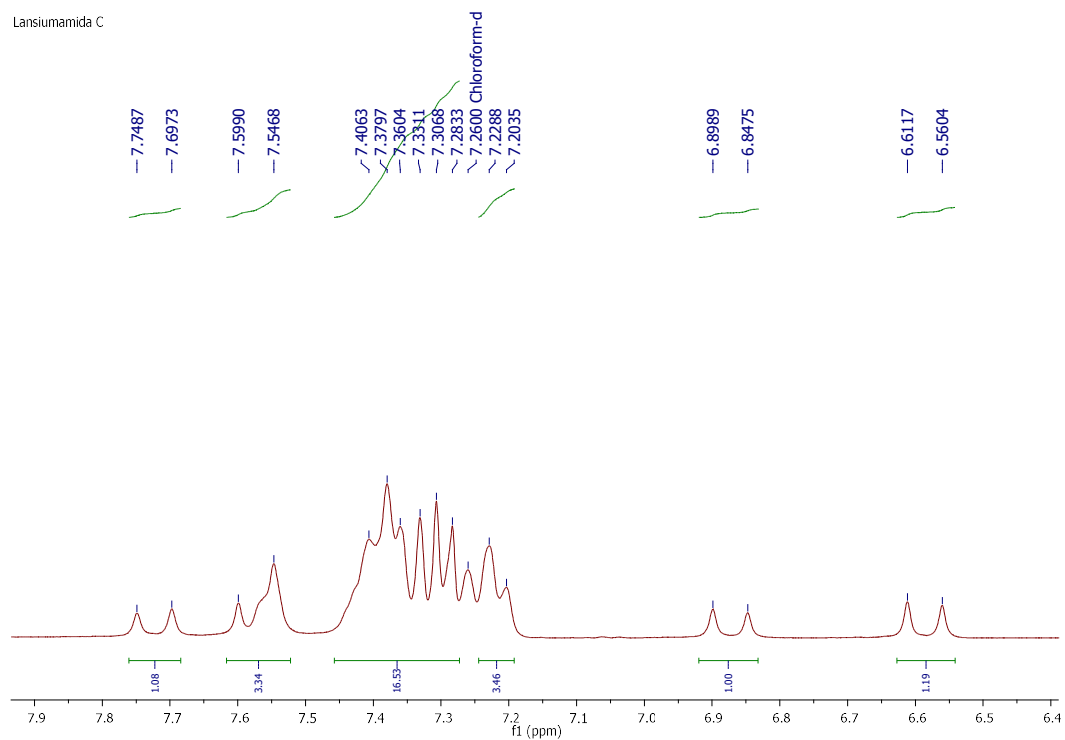

**Figure S9.** Enlarged  $^1\text{H}$  NMR spectrum (300 MHz,  $\text{CDCl}_3$ ) of Lansiumamide C (**21**).

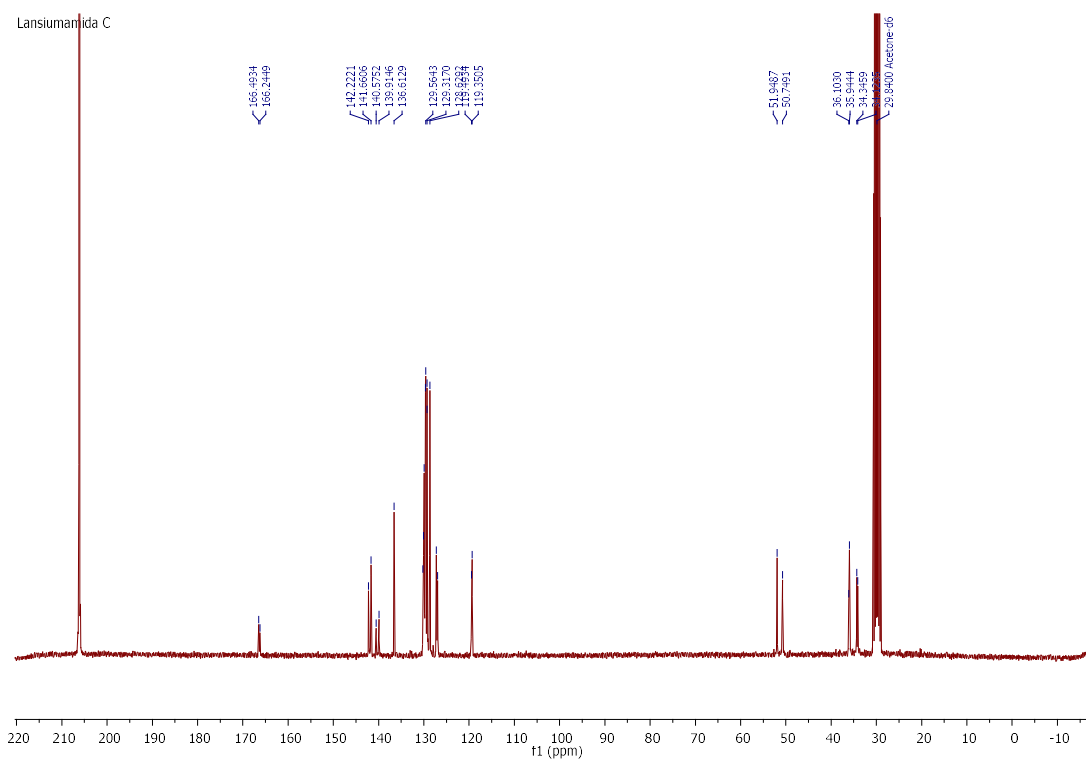

**Figure S10.**  $^{13}\text{C}$  NMR spectrum (75 MHz,  $\text{CDCl}_3$ ) of Lansiumamide C (**21**).

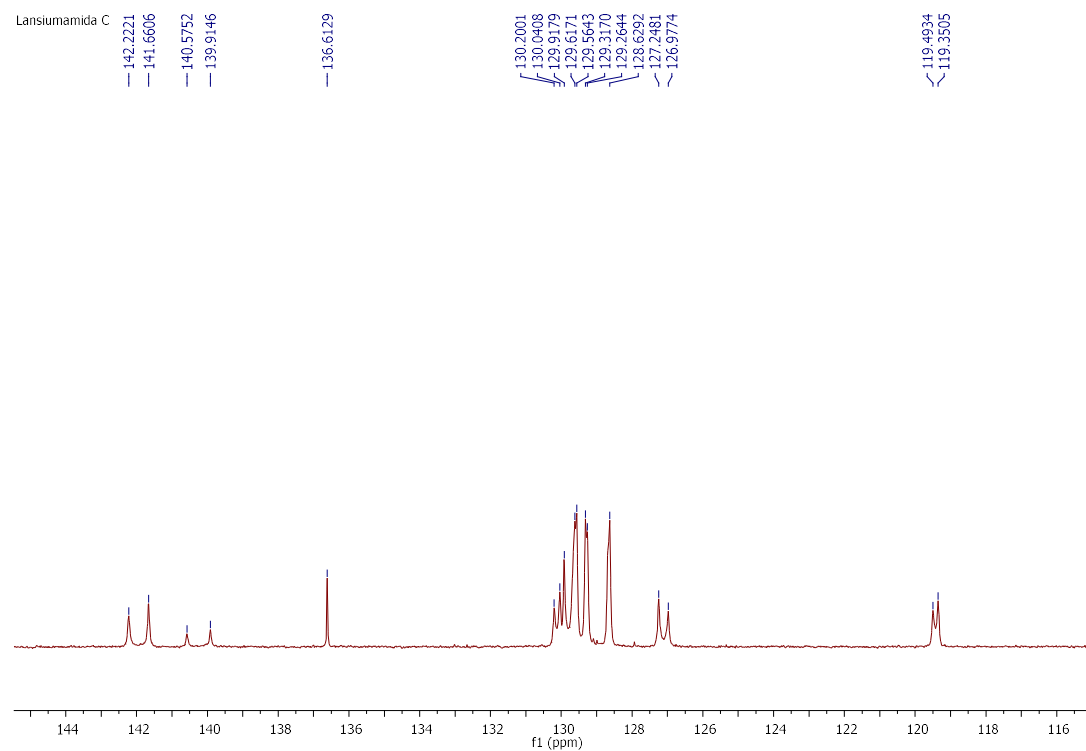

**Figure S11.** Enlarged  $^{13}\text{C}$  NMR spectrum (75 MHz,  $\text{CDCl}_3$ ) of Lansiumamide C (**21**).

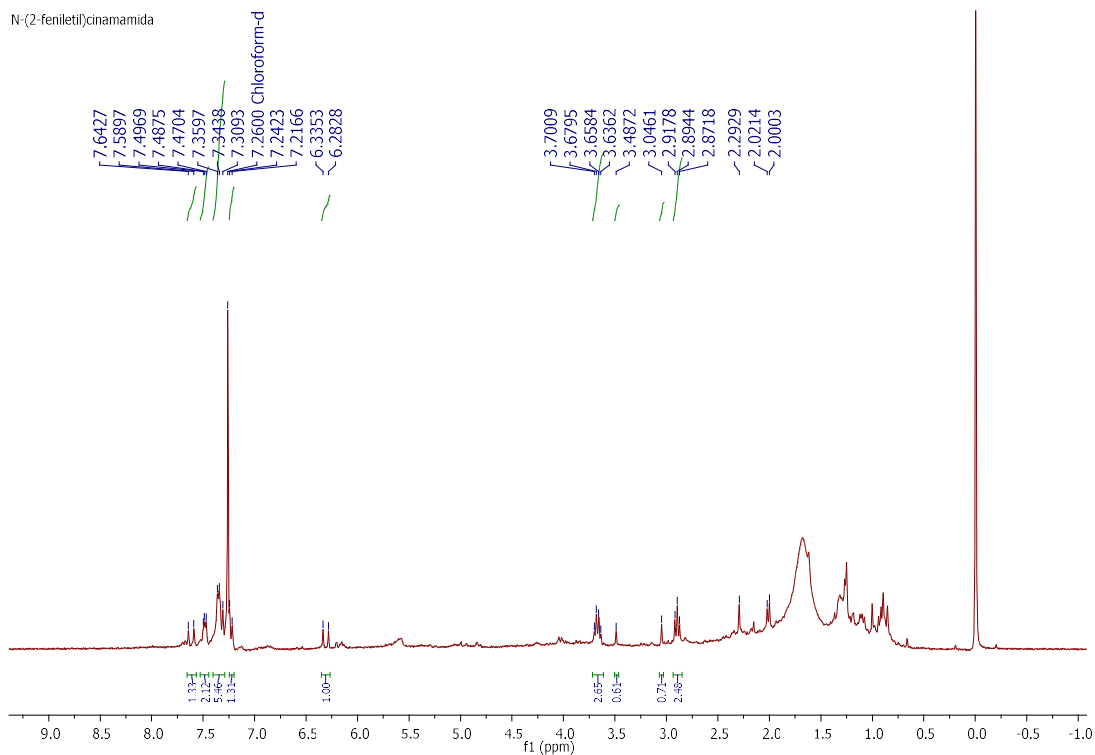

Figure S12.  $^1\text{H}$  NMR spectrum (300 MHz,  $\text{CDCl}_3$ ) of *N*-(2-phenylethyl)-cinnamide (**22**).

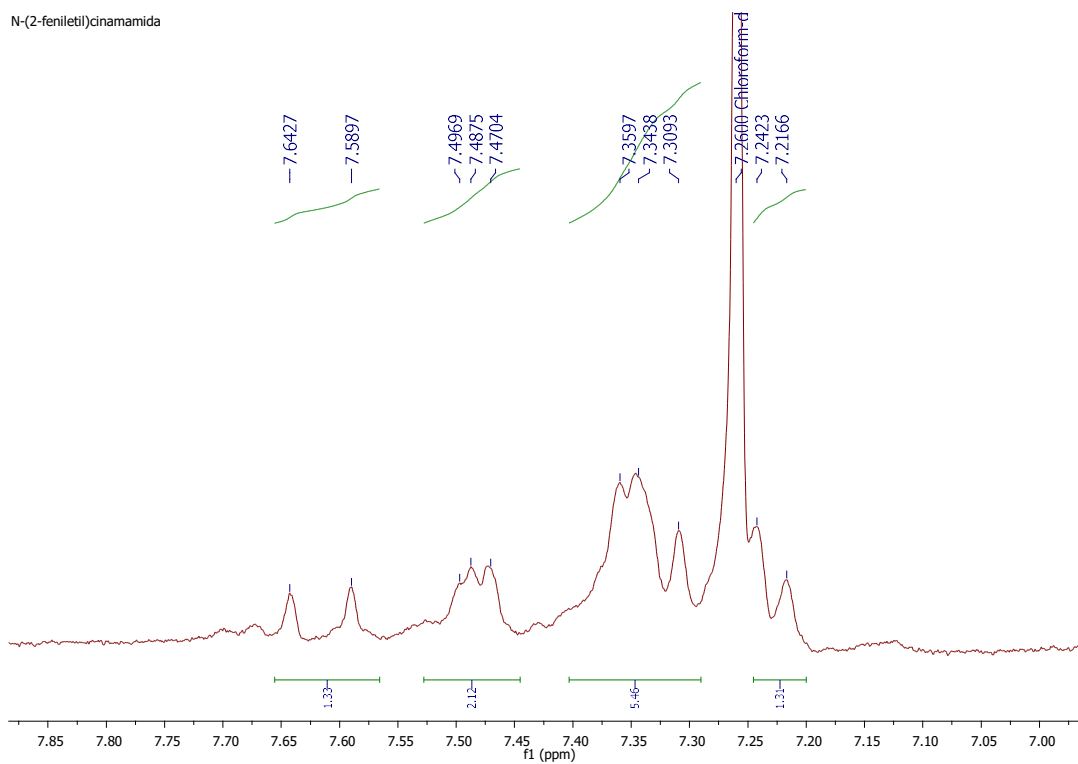

Figure S13. Enlarged  $^1\text{H}$  NMR spectrum (300 MHz,  $\text{CDCl}_3$ ) of *N*-(2-phenylethyl)-cinnamide (**22**).

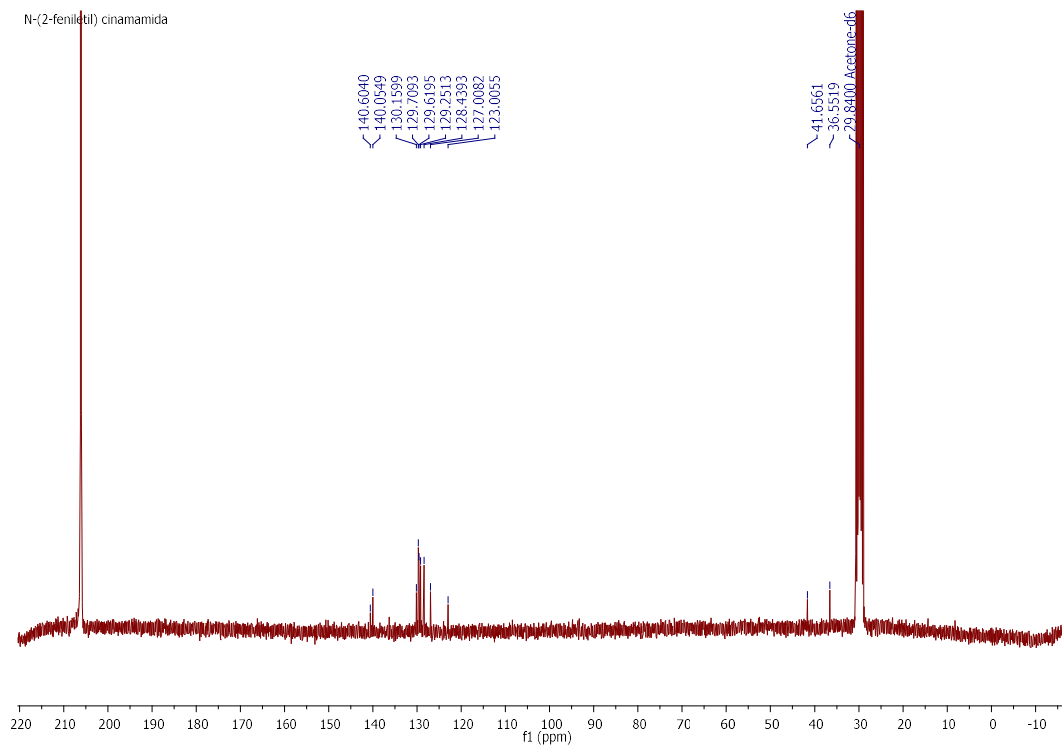

**Figure S14.**  $^{13}\text{C}$  NMR spectrum (75 MHz,  $\text{CDCl}_3$ ) of *N*-(2-phenylethyl)-cinnamamide (**22**).

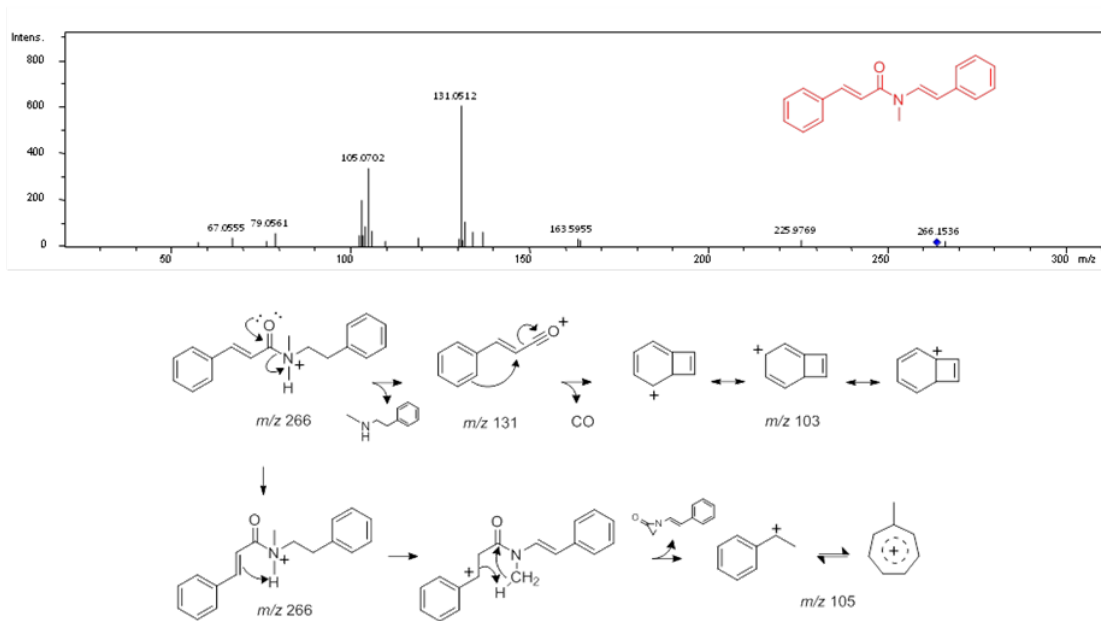

**Figure S15.** Fragmentation scheme for compound (**19**).



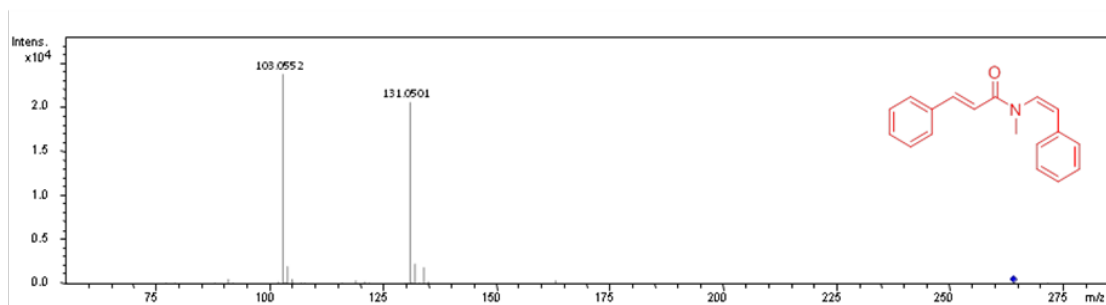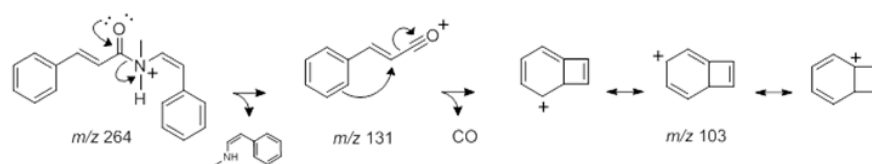

Figure S16. Fragmentation scheme for compound (20).

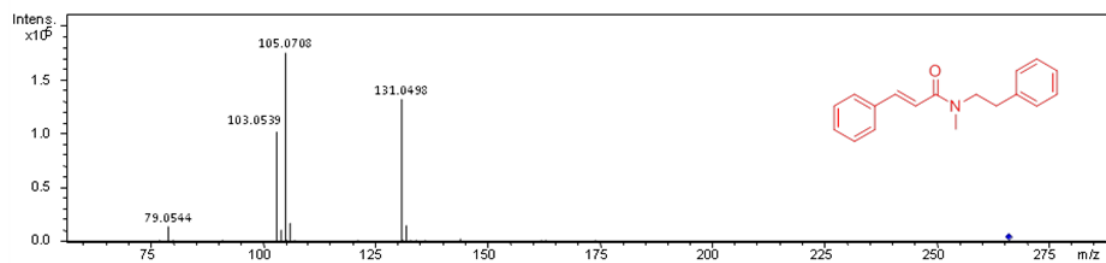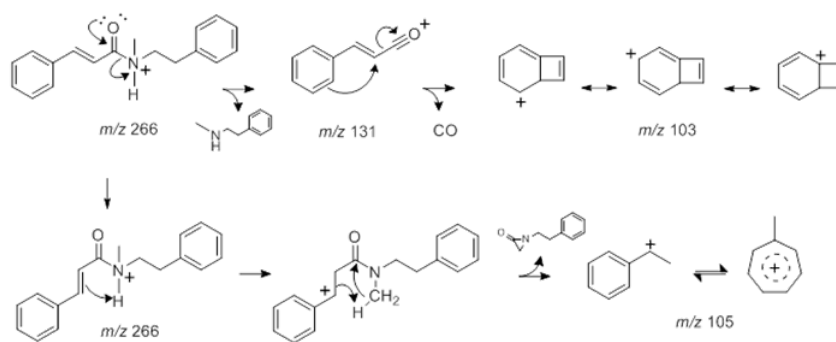

Figure S17. Fragmentation scheme for compound (21).

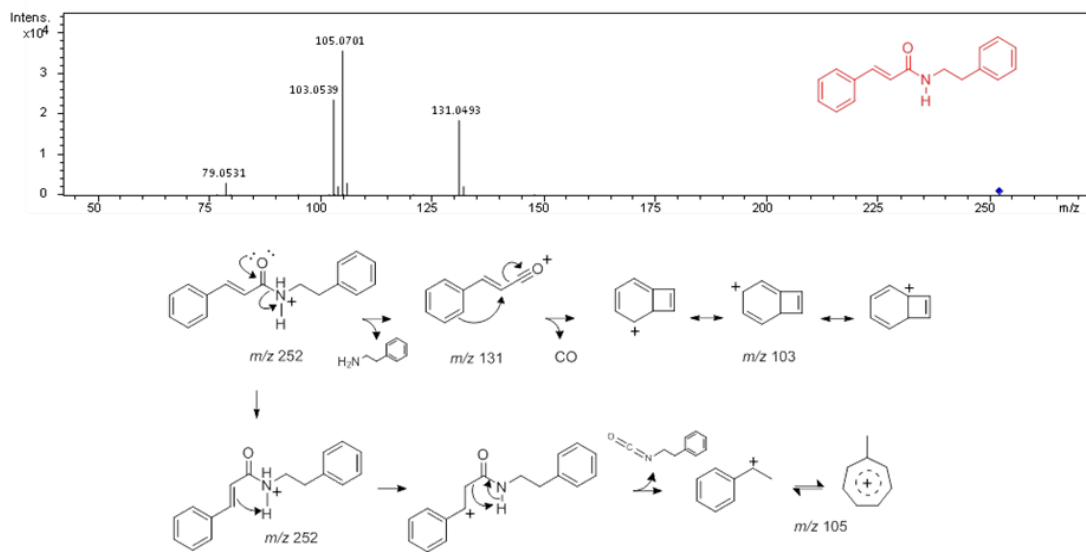

**Figure A18.** Fragmentation scheme for compound (21).
